# Supplementary material for: Developing a clinical prediction rule for repeated consultations with functional somatic symptoms in primary care: a cohort study
Source: PubMed Central journal article supplement (PMC7799137; doi:10.1136/bmjopen-2020-040730), 2021-01-08
Supplement: bmjopen-2020-040730supp001.pdf [file bmjopen-2020-040730supp001.pdf]

**Supplemental Table 1.** Functional somatic symptoms and the corresponding International Classification of Primary Care codes

| Symptom                    | International Classification of Primary Care code |
|----------------------------|---------------------------------------------------|
| Generalized pain           | A01                                               |
| Fatigue/Tiredness/weakness | A04                                               |
| Abdominal pain             | D01                                               |
| Flatulence                 | D08                                               |
| Nauseous                   | D09                                               |
| Constipation               | D12                                               |
| Defecation problems        | D18                                               |
| Irritable Bowel Syndrome   | D93                                               |
| Chest pain                 | K01; K02                                          |
| Palpitations               | K04                                               |
| Joint pain                 | L01; L08                                          |
| Back pain                  | L02; L03                                          |
| Extremities pain           | L09; L14                                          |
| Headache                   | N01; N02                                          |
| Wheezy                     | N02                                               |
| Dizzy                      | N20                                               |
| Sleep disorder             | P06                                               |
| Concentration problems     | P20                                               |
| Sore Throat                | R21                                               |
| Loss in appetite           | T03                                               |
| Weight gain/loss           | T07; T08                                          |
