# Supplementary material for: Developing a clinical prediction rule for repeated consultations with functional somatic symptoms in primary care: a cohort study
Source: PubMed Central journal article supplement (PMC7799137; doi:10.1136/bmjopen-2020-040730), 2021-01-08
Supplement: bmjopen-2020-040730supp002.pdf [file bmjopen-2020-040730supp002.pdf]

**Supplemental Table 2.** Comparison of patients with and without missing values

|                                                               | No missing values<br>(n = 2,002) |                 | Missing values<br>(n = 648) |                 | Univariable OR<br>(95% CI) |
|---------------------------------------------------------------|----------------------------------|-----------------|-----------------------------|-----------------|----------------------------|
|                                                               | n                                | value           | n                           | value           |                            |
| Age, mean y (SD)                                              | 2,002                            | 42 (12)         | 634                         | 54 (17)         | <b>1.07 (1.06–1.07)</b>    |
| Male, n (%)                                                   | 2,002                            | 622 (31)        | 648                         | 226 (35)        | 1.19 (0.99–1.43)           |
| Neuroticism, median (IQR)                                     | 2,002                            | 10.1 (9.1–11.3) | 246                         | 10.3 (9.3–11.5) | 1.04 (0.96–1.12)           |
| Chronic stress, median (IQR)                                  | 2,002                            | 3 (1–4)         | 463                         | 2 (0–4)         | <b>0.90 (0.86–0.94)</b>    |
| Stressful life events,<br>median (IQR)                        | 2,002                            | 1 (0–2)         | 462                         | 1 (0–2)         | <b>1.09 (1.02–1.17)</b>    |
| Self-rated health,<br>median (IQR)                            | 2,002                            | 3 (2–3)         | 546                         | 3 (2–3)         | 1.10 (0.97–1.25)           |
| Healthy activity <sup>a</sup> , n (%)                         | 2,002                            | 1,056 (53)      | 272                         | 203 (75)        | <b>2.63 (1.98–3.51)</b>    |
| Body mass index (kg/m <sup>2</sup> ),<br>median (IQR)         | 2,002                            | 25 (23–28)      | 646                         | 26 (24–29)      | <b>1.05 (1.03–1.07)</b>    |
| Living alone, n (%)                                           | 2,002                            | 233 (12)        | 520                         | 102 (20)        | <b>1.85 (1.43–2.39)</b>    |
| Higher education <sup>b</sup> , n (%)                         | 2,002                            | 1,412 (71)      | 570                         | 295 (52)        | <b>0.45 (0.37–0.54)</b>    |
| MDD <sup>c</sup> , n (%)                                      | 2,002                            | 64 (3)          | 553                         | 22 (4)          | 1.25 (0.77–2.06)           |
| GAD <sup>d</sup> , n (%)                                      | 2,002                            | 138 (7)         | 553                         | 27 (5)          | 0.69 (0.45–1.06)           |
| Psychiatric consultations<br>last year <sup>e,f</sup> , n (%) | 2,002                            | 205 (10)        | 648                         | 87 (13)         | 1.07 (0.96–1.19)           |
| GP consultations last year <sup>f</sup> ,<br>median (IQR)     | 2,002                            | 2 (0–5)         | 648                         | 3 (1–6)         | <b>1.05 (1.03–1.08)</b>    |
| Repeated consultations <sup>g</sup> , n<br>(%)                | 2,002                            | 200 (10)        | 648                         | 97 (15)         | <b>1.59 (1.22–2.06)</b>    |

<sup>a</sup> Healthy activity, defined as 30 minutes at least 5 days a week.

<sup>b</sup> Higher education, defined as at least secondary vocational education or work-based training.

<sup>c</sup> MDD: Major Depressive Disorder.

<sup>d</sup> GAD: Generalized Anxiety Disorder.

<sup>e</sup> Patients with a consultation code in the P chapter of the International Classification of Primary Care.

<sup>f</sup> Predictors from NPCD and both are continuous variables. Other predictors are from Lifelines database.

<sup>g</sup> Repeated consultations is defined as  $\geq 3$  extra functional somatic symptoms consultations during one year of follow-up.

Note: 24% (648/2,650) had a missing value

Abbreviations: SD, standard deviation; IQR, Interquartile Range; GP, general practitioner; OR, odds ratio
