# Supplementary material for: Developing a clinical prediction rule for repeated consultations with functional somatic symptoms in primary care: a cohort study
Source: PubMed Central journal article supplement (PMC7799137; doi:10.1136/bmjopen-2020-040730), 2021-01-08
Supplement: bmjopen-2020-040730supp004.pdf [file bmjopen-2020-040730supp004.pdf]

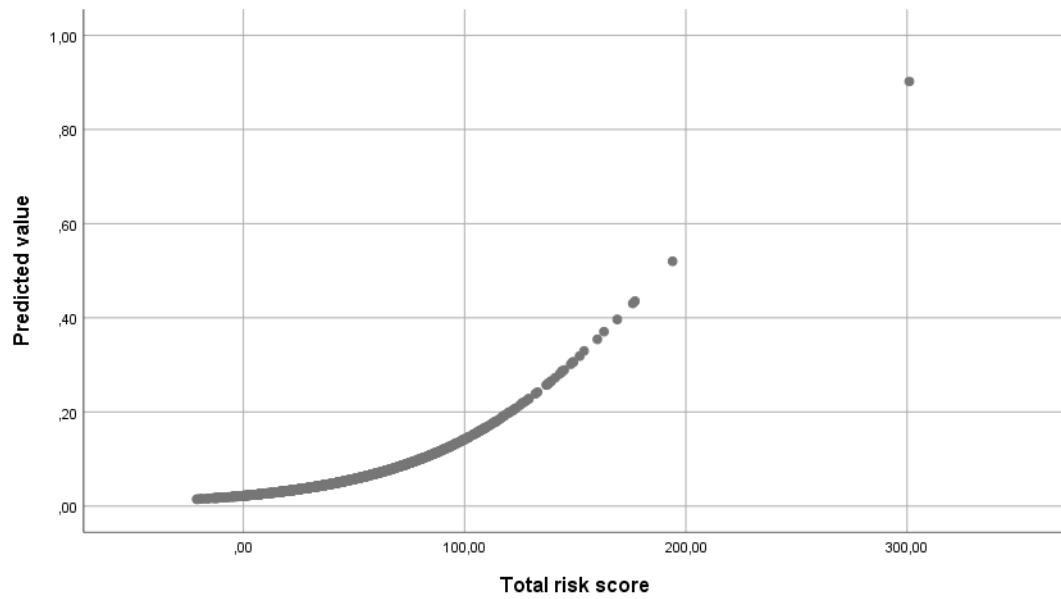

**Supplemental Figure 2.** Relation between the total risk score and the predicted risk of repeated consultations with functional somatic symptoms
